# Supplementary material for: An update of data compilation on the biological response to ocean acidification and overview of the OA-ICC data portal
Source: Copernicus journal article supplement (doi:10.5194/essd-16-3771-2024), 2024-08-26

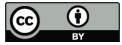

*Supplement of*

## **An update of data compilation on the biological response to ocean acidification and overview of the OA-ICC data portal**

**Yan Yang et al.**

*Correspondence to:* Yan Yang ([yangyan@xmu.edu.cn](mailto:yangyan@xmu.edu.cn))

The copyright of individual parts of the supplement might differ from the article licence.

## Keywords description

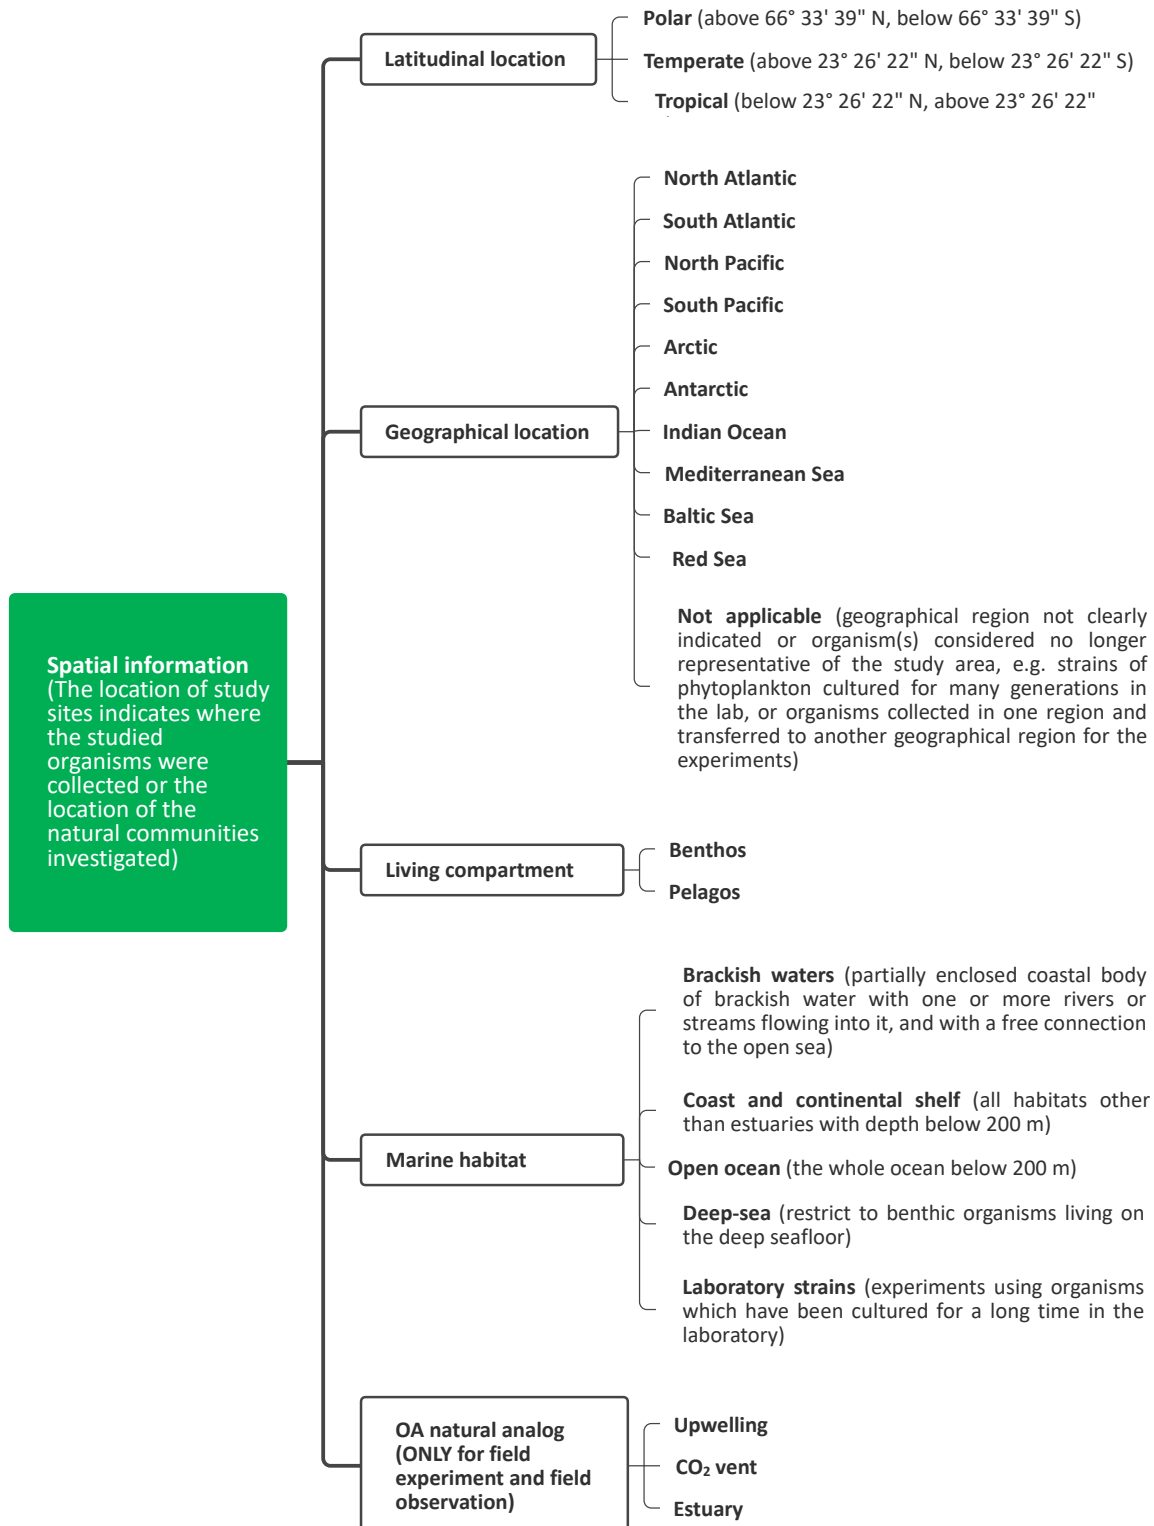

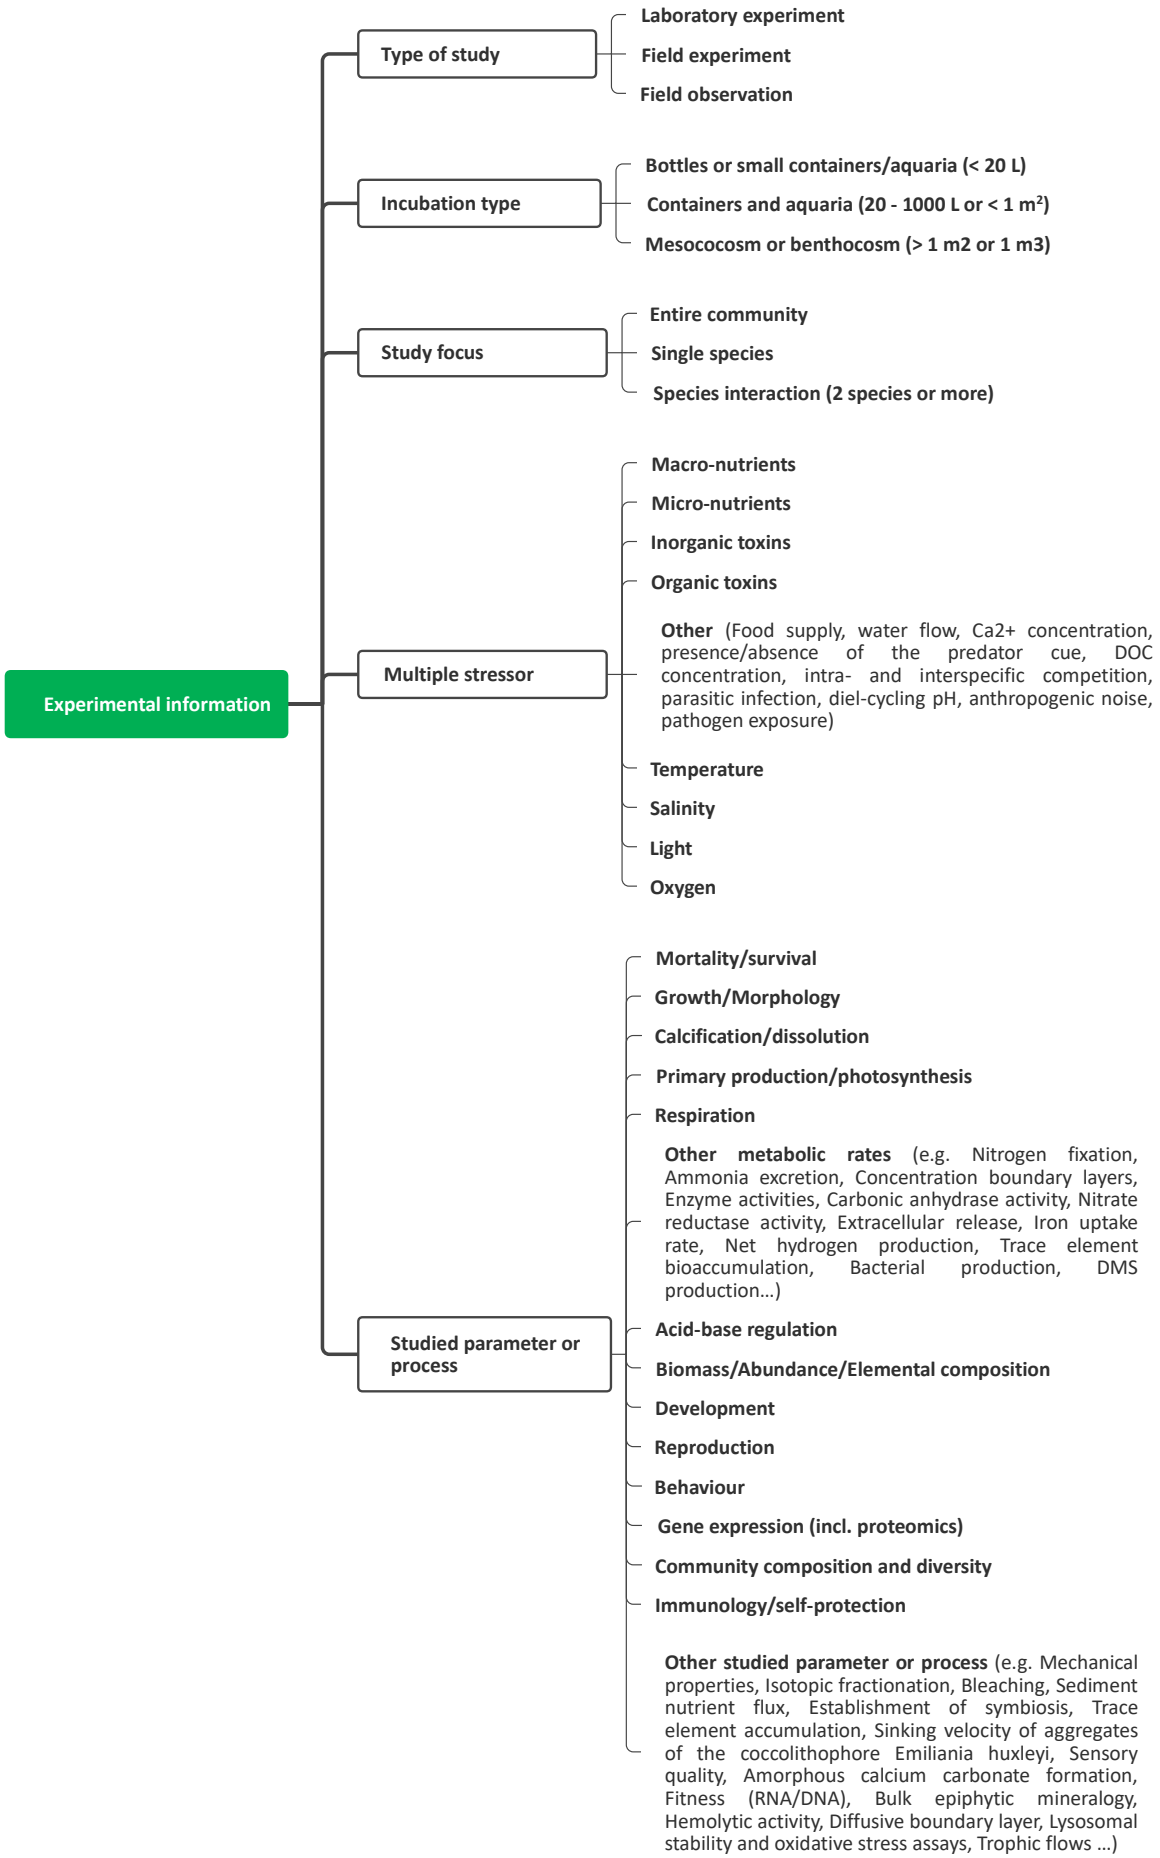

**Experimental information**

**Type of study**

- Laboratory experiment
- Field experiment
- Field observation

**Incubation type**

- Bottles or small containers/aquaria (< 20 L)
- Containers and aquaria (20 - 1000 L or < 1 m<sup>2</sup>)
- Mesocosm or benthocosm (> 1 m<sup>2</sup> or 1 m<sup>3</sup>)

**Study focus**

- Entire community
- Single species
- Species interaction (2 species or more)

**Multiple stressor**

- Macro-nutrients
- Micro-nutrients
- Inorganic toxins
- Organic toxins
- Other (Food supply, water flow, Ca<sup>2+</sup> concentration, presence/absence of the predator cue, DOC concentration, intra- and interspecific competition, parasitic infection, diel-cycling pH, anthropogenic noise, pathogen exposure)
- Temperature
- Salinity
- Light
- Oxygen

**Studied parameter or process**

- Mortality/survival
- Growth/Morphology
- Calcification/dissolution
- Primary production/photosynthesis
- Respiration
- Other metabolic rates (e.g. Nitrogen fixation, Ammonia excretion, Concentration boundary layers, Enzyme activities, Carbonic anhydrase activity, Nitrate reductase activity, Extracellular release, Iron uptake rate, Net hydrogen production, Trace element bioaccumulation, Bacterial production, DMS production...)
- Acid-base regulation
- Biomass/Abundance/Elemental composition
- Development
- Reproduction
- Behaviour
- Gene expression (incl. proteomics)
- Community composition and diversity
- Immunology/self-protection
- Other studied parameter or process (e.g. Mechanical properties, Isotopic fractionation, Bleaching, Sediment nutrient flux, Establishment of symbiosis, Trace element accumulation, Sinking velocity of aggregates of the coccolithophore *Emiliania huxleyi*, Sensory quality, Amorphous calcium carbonate formation, Fitness (RNA/DNA), Bulk epiphytic mineralogy, Hemolytic activity, Diffusive boundary layer, Lysosomal stability and oxidative stress assays, Trophic flows ...)

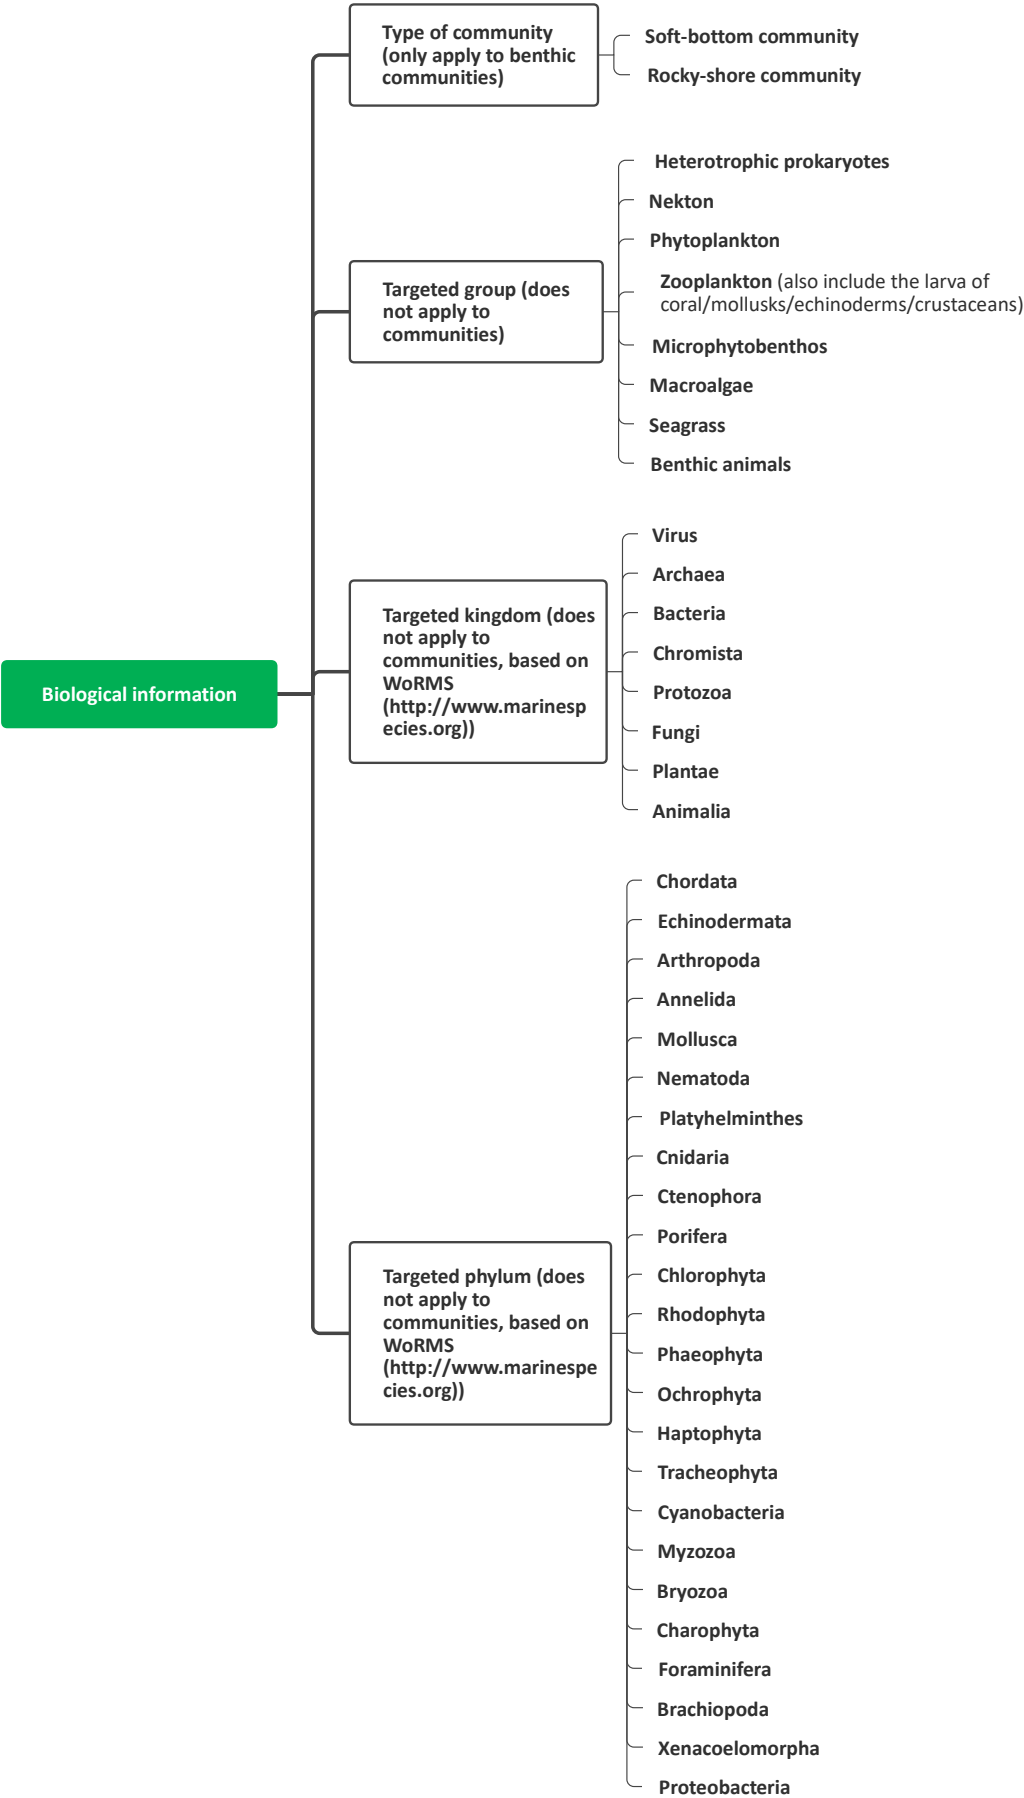

Supplement: Supplementary file 1 [file essd-16-3771-2024-supplement.pdf]
